# Supplementary material
Source: publisher figshare collection journal article supplement (https://sage.figshare.com/ndownloader/files/18725213)
Supplement: Supplementary file 1 [file 18725213]

## Sheet: Downregulated
GroupID	Category	Term	Description	LogP	InTerm_InList	Symbols
1_Summary	KEGG Pathway	mmu04640	Hematopoietic cell lineage	-18.6682	13/95	Cd19,Cd1d1,Ms4a1,Cd22,Cd3d,Cd3e,Cd3g,Cd8b1,Cr2,Fcer2a,H2-Oa,H2-Ob,Il1r2,Arg2,Cd79a,Ccr7,Lef1,Tnfrsf13c,Siglecg,Adam8,Ly6d,Spib,Rasgrp3,Ets1
1_Member	KEGG Pathway	mmu04640	Hematopoietic cell lineage	-18.6682	13/95	Cd19,Cd1d1,Ms4a1,Cd22,Cd3d,Cd3e,Cd3g,Cd8b1,Cr2,Fcer2a,H2-Oa,H2-Ob,Il1r2
1_Member	GO Biological Processes	GO:0002250	adaptive immune response	-9.74583	14/567	Arg2,Cd19,Cd1d1,Cd3d,Cd3e,Cd3g,Cd79a,Cd8b1,Ccr7,Cr2,Fcer2a,Lef1,Tnfrsf13c,Siglecg
1_Member	GO Biological Processes	GO:0030098	lymphocyte differentiation	-9.4014	12/393	Adam8,Cd19,Cd1d1,Cd3d,Cd3e,Cd3g,Cd79a,Ccr7,Cr2,H2-Oa,Lef1,Ly6d
1_Member	Reactome Gene Sets	R-MMU-198933	Immunoregulatory interactions between a Lymphoid and a non-Lymphoid cell	-9.33765	8/109	Cd19,Cd1d1,Cd22,Cd3d,Cd3e,Cd3g,Cd8b1,Siglecg
1_Member	KEGG Pathway	mmu05340	Primary immunodeficiency	-9.30617	6/36	Cd19,Cd3d,Cd3e,Cd79a,Cd8b1,Tnfrsf13c
1_Member	GO Biological Processes	GO:0002521	leukocyte differentiation	-8.68701	13/564	Adam8,Cd19,Cd1d1,Cd3d,Cd3e,Cd3g,Cd79a,Ccr7,Cr2,H2-Oa,Lef1,Ly6d,Spib
1_Member	GO Biological Processes	GO:0045061	thymic T cell selection	-8.06527	5/27	Cd1d1,Cd3d,Cd3e,Cd3g,Ccr7
1_Member	CORUM	CORUM:5310	Cd3d-Cd3g-Cd3e-Cd247 complex	-7.14549	3/4	Cd3d,Cd3e,Cd3g
1_Member	GO Biological Processes	GO:0045059	positive thymic T cell selection	-7.09582	4/16	Cd1d1,Cd3d,Cd3e,Cd3g
1_Member	Reactome Gene Sets	R-MMU-1280218	Adaptive Immune System	-6.88871	12/661	Cd19,Cd1d1,Cd22,Cd3d,Cd3e,Cd3g,Cd79a,Cd8b1,H2-Oa,H2-Ob,Rasgrp3,Siglecg
1_Member	GO Biological Processes	GO:0033077	T cell differentiation in thymus	-6.84919	6/90	Adam8,Cd1d1,Cd3d,Cd3e,Cd3g,Ccr7
1_Member	GO Biological Processes	GO:0045058	T cell selection	-6.45541	5/55	Cd1d1,Cd3d,Cd3e,Cd3g,Ccr7
1_Member	GO Biological Processes	GO:0030217	T cell differentiation	-6.28364	8/268	Adam8,Cd1d1,Cd3d,Cd3e,Cd3g,Ccr7,H2-Oa,Lef1
1_Member	KEGG Pathway	mmu05166	HTLV-I infection	-6.10521	8/283	Cd3d,Cd3e,Cd3g,H2-Oa,H2-Ob,Il1r2,Ets1,Tnfrsf13c
1_Member	Reactome Gene Sets	R-MMU-202430	Translocation of ZAP-70 to Immunological synapse	-5.53581	3/11	Cd3d,Cd3e,Cd3g
1_Member	GO Biological Processes	GO:0043368	positive T cell selection	-5.50662	4/38	Cd1d1,Cd3d,Cd3e,Cd3g
1_Member	KEGG Pathway	mmu04658	Th1 and Th2 cell differentiation	-5.45725	5/87	Cd3d,Cd3e,Cd3g,H2-Oa,H2-Ob
1_Member	KEGG Pathway	mmu04659	Th17 cell differentiation	-5.11739	5/102	Cd3d,Cd3e,Cd3g,H2-Oa,H2-Ob
1_Member	Reactome Gene Sets	R-MMU-202427	Phosphorylation of CD3 and TCR zeta chains	-5.09857	3/15	Cd3d,Cd3e,Cd3g
1_Member	Reactome Gene Sets	R-MMU-389948	PD-1 signaling	-5.00921	3/16	Cd3d,Cd3e,Cd3g
1_Member	Reactome Gene Sets	R-MMU-202433	Generation of second messenger molecules	-4.51492	3/23	Cd3d,Cd3e,Cd3g
1_Member	KEGG Pathway	mmu04660	T cell receptor signaling pathway	-3.78488	4/103	Cd3d,Cd3e,Cd3g,Cd8b1
1_Member	Reactome Gene Sets	R-MMU-202403	TCR signaling	-3.25914	3/60	Cd3d,Cd3e,Cd3g
1_Member	Reactome Gene Sets	R-MMU-388841	Costimulation by the CD28 family	-3.21733	3/62	Cd3d,Cd3e,Cd3g
1_Member	KEGG Pathway	mmu05142	Chagas disease (American trypanosomiasis)	-2.60505	3/101	Cd3d,Cd3e,Cd3g
1_Member	KEGG Pathway	mmu05162	Measles	-2.24246	3/136	Cd3d,Cd3e,Cd3g
2_Summary	GO Biological Processes	GO:0046651	lymphocyte proliferation	-9.34617	11/308	Arg2,Cd19,Cd1d1,Cd22,Cd3e,Cd79a,Ccr7,Cr2,Lef1,Tnfrsf13c,Siglecg,Adam8,H2-Oa,Hsph1,Thbs1,Vpreb3,Dnaja1,Il1r2,Ms4a1,H2-Ob,Ubash3a,Fcer2a,Trim59
2_Member	GO Biological Processes	GO:0046651	lymphocyte proliferation	-9.34617	11/308	Arg2,Cd19,Cd1d1,Cd22,Cd3e,Cd79a,Ccr7,Cr2,Lef1,Tnfrsf13c,Siglecg
2_Member	GO Biological Processes	GO:0032943	mononuclear cell proliferation	-9.31645	11/310	Arg2,Cd19,Cd1d1,Cd22,Cd3e,Cd79a,Ccr7,Cr2,Lef1,Tnfrsf13c,Siglecg
2_Member	GO Biological Processes	GO:0070661	leukocyte proliferation	-9.03009	11/330	Arg2,Cd19,Cd1d1,Cd22,Cd3e,Cd79a,Ccr7,Cr2,Lef1,Tnfrsf13c,Siglecg
2_Member	GO Biological Processes	GO:0042100	B cell proliferation	-7.7552	7/111	Cd19,Cd22,Cd79a,Cr2,Lef1,Tnfrsf13c,Siglecg
2_Member	GO Biological Processes	GO:0002694	regulation of leukocyte activation	-6.9531	12/652	Adam8,Arg2,Cd19,Cd1d1,Cd22,Cd3e,Ccr7,H2-Oa,Hsph1,Thbs1,Tnfrsf13c,Siglecg
2_Member	GO Biological Processes	GO:0051025	negative regulation of immunoglobulin secretion	-6.74837	3/5	Cd22,Vpreb3,Siglecg
2_Member	GO Biological Processes	GO:0051249	regulation of lymphocyte activation	-6.69409	11/557	Adam8,Arg2,Cd19,Cd1d1,Cd22,Cd3e,Ccr7,H2-Oa,Hsph1,Tnfrsf13c,Siglecg
2_Member	GO Biological Processes	GO:0050865	regulation of cell activation	-6.66754	12/693	Adam8,Arg2,Cd19,Cd1d1,Cd22,Cd3e,Ccr7,H2-Oa,Hsph1,Thbs1,Tnfrsf13c,Siglecg
2_Member	GO Biological Processes	GO:1904950	negative regulation of establishment of protein localization	-6.00625	7/200	Arg2,Cd22,Dnaja1,Hsph1,Il1r2,Vpreb3,Siglecg
2_Member	GO Biological Processes	GO:0050670	regulation of lymphocyte proliferation	-5.66513	7/225	Arg2,Cd1d1,Cd22,Cd3e,Ccr7,Tnfrsf13c,Siglecg
2_Member	GO Biological Processes	GO:0032944	regulation of mononuclear cell proliferation	-5.63964	7/227	Arg2,Cd1d1,Cd22,Cd3e,Ccr7,Tnfrsf13c,Siglecg
2_Member	GO Biological Processes	GO:0070663	regulation of leukocyte proliferation	-5.50362	7/238	Arg2,Cd1d1,Cd22,Cd3e,Ccr7,Tnfrsf13c,Siglecg
2_Member	GO Biological Processes	GO:0002638	negative regulation of immunoglobulin production	-5.29857	3/13	Cd22,Vpreb3,Siglecg
2_Member	GO Biological Processes	GO:0042113	B cell activation	-4.95446	8/405	Cd19,Ms4a1,Cd22,Cd79a,Cr2,Lef1,Tnfrsf13c,Siglecg
2_Member	GO Biological Processes	GO:0051023	regulation of immunoglobulin secretion	-4.63765	3/21	Cd22,Vpreb3,Siglecg
2_Member	GO Biological Processes	GO:0002683	negative regulation of immune system process	-4.51698	8/466	Arg2,Cd22,H2-Oa,H2-Ob,Thbs1,Vpreb3,Siglecg,Ubash3a
2_Member	GO Biological Processes	GO:0050709	negative regulation of protein secretion	-4.39259	5/144	Arg2,Cd22,Il1r2,Vpreb3,Siglecg
2_Member	GO Biological Processes	GO:0048305	immunoglobulin secretion	-4.30029	3/27	Cd22,Vpreb3,Siglecg
2_Member	GO Biological Processes	GO:0002792	negative regulation of peptide secretion	-4.25354	5/154	Arg2,Cd22,Il1r2,Vpreb3,Siglecg
2_Member	GO Biological Processes	GO:0002701	negative regulation of production of molecular mediator of immune response	-3.95706	3/35	Cd22,Vpreb3,Siglecg
2_Member	GO Biological Processes	GO:0051224	negative regulation of protein transport	-3.77077	5/195	Arg2,Cd22,Il1r2,Vpreb3,Siglecg
2_Member	GO Biological Processes	GO:1903531	negative regulation of secretion by cell	-3.4921	5/224	Arg2,Cd22,Il1r2,Vpreb3,Siglecg
2_Member	GO Biological Processes	GO:0051048	negative regulation of secretion	-3.2508	5/253	Arg2,Cd22,Il1r2,Vpreb3,Siglecg
2_Member	GO Biological Processes	GO:0070201	regulation of establishment of protein localization	-3.22514	8/719	Arg2,Cd22,Ccr7,Dnaja1,Hsph1,Il1r2,Vpreb3,Siglecg
2_Member	GO Biological Processes	GO:0030888	regulation of B cell proliferation	-3.08149	3/69	Cd22,Tnfrsf13c,Siglecg
2_Member	GO Biological Processes	GO:0002697	regulation of immune effector process	-3.07891	6/418	Cd1d1,Cd22,Ccr7,Fcer2a,Vpreb3,Siglecg
2_Member	GO Biological Processes	GO:0002637	regulation of immunoglobulin production	-2.9762	3/75	Cd22,Vpreb3,Siglecg
2_Member	GO Biological Processes	GO:0050708	regulation of protein secretion	-2.80347	6/473	Arg2,Cd22,Ccr7,Il1r2,Vpreb3,Siglecg
2_Member	GO Biological Processes	GO:0051223	regulation of protein transport	-2.64989	7/688	Arg2,Cd22,Ccr7,Dnaja1,Il1r2,Vpreb3,Siglecg
2_Member	GO Biological Processes	GO:0019722	calcium-mediated signaling	-2.63299	4/209	Cd22,Cd3e,Ccr7,Siglecg
2_Member	GO Biological Processes	GO:0002791	regulation of peptide secretion	-2.63033	6/512	Arg2,Cd22,Ccr7,Il1r2,Vpreb3,Siglecg
2_Member	GO Biological Processes	GO:0050848	regulation of calcium-mediated signaling	-2.60505	3/101	Cd22,Cd3e,Siglecg
2_Member	GO Biological Processes	GO:1902532	negative regulation of intracellular signal transduction	-2.58849	6/522	Cd22,Dnaja1,Hsph1,Thbs1,Trim59,Siglecg
2_Member	GO Biological Processes	GO:0051051	negative regulation of transport	-2.57612	6/525	Arg2,Cd22,Il1r2,Thbs1,Vpreb3,Siglecg
2_Member	GO Biological Processes	GO:0090087	regulation of peptide transport	-2.50951	7/729	Arg2,Cd22,Ccr7,Dnaja1,Il1r2,Vpreb3,Siglecg
2_Member	GO Biological Processes	GO:0009306	protein secretion	-2.3529	6/583	Arg2,Cd22,Ccr7,Il1r2,Vpreb3,Siglecg
2_Member	GO Biological Processes	GO:0002698	negative regulation of immune effector process	-2.27841	3/132	Cd22,Vpreb3,Siglecg
2_Member	GO Biological Processes	GO:0050864	regulation of B cell activation	-2.24837	4/268	Cd19,Cd22,Tnfrsf13c,Siglecg
2_Member	GO Biological Processes	GO:0019932	second-messenger-mediated signaling	-2.24599	5/430	Cd22,Cd3e,Ccr7,Thbs1,Siglecg
2_Member	GO Biological Processes	GO:0002790	peptide secretion	-2.19794	6/628	Arg2,Cd22,Ccr7,Il1r2,Vpreb3,Siglecg
2_Member	GO Biological Processes	GO:0002700	regulation of production of molecular mediator of immune response	-2.13321	3/149	Cd22,Vpreb3,Siglecg
3_Summary	GO Biological Processes	GO:0002581	negative regulation of antigen processing and presentation of peptide or polysaccharide antigen via	-7.74673	3/3	H2-Oa,H2-Ob,Thbs1,Ccr7,Cd1d1,Tnfrsf13c,Cd22,Cd8b1
3_Member	GO Biological Processes	GO:0002581	negative regulation of antigen processing and presentation of peptide or polysaccharide antigen via	-7.74673	3/3	H2-Oa,H2-Ob,Thbs1
3_Member	GO Biological Processes	GO:0002577	regulation of antigen processing and presentation	-6.77008	4/19	Ccr7,H2-Oa,H2-Ob,Thbs1
3_Member	GO Biological Processes	GO:0002580	regulation of antigen processing and presentation of peptide or polysaccharide antigen via MHC class	-6.74837	3/5	H2-Oa,H2-Ob,Thbs1
3_Member	GO Biological Processes	GO:0002578	negative regulation of antigen processing and presentation	-6.44816	3/6	H2-Oa,H2-Ob,Thbs1
3_Member	GO Biological Processes	GO:0019882	antigen processing and presentation	-4.99609	5/108	Cd1d1,Ccr7,H2-Oa,H2-Ob,Thbs1
3_Member	GO Biological Processes	GO:0002504	antigen processing and presentation of peptide or polysaccharide antigen via MHC class II	-4.70378	3/20	H2-Oa,H2-Ob,Thbs1
3_Member	KEGG Pathway	mmu04672	Intestinal immune network for IgA production	-3.68817	3/43	H2-Oa,H2-Ob,Tnfrsf13c
3_Member	KEGG Pathway	mmu04514	Cell adhesion molecules (CAMs)	-2.97096	4/169	Cd22,Cd8b1,H2-Oa,H2-Ob
3_Member	KEGG Pathway	mmu04612	Antigen processing and presentation	-2.73419	3/91	Cd8b1,H2-Oa,H2-Ob
4_Summary	GO Biological Processes	GO:0042110	T cell activation	-7.25466	11/490	Adam8,Arg2,Cd1d1,Cd3d,Cd3e,Cd3g,Ccr7,H2-Oa,Hsph1,Lef1,Tnfrsf13c,Ets1,Thbs1,S1pr1,Il1r2,Ubash3a,Cd19,Cr2,Fcer2a
4_Member	GO Biological Processes	GO:0042110	T cell activation	-7.25466	11/490	Adam8,Arg2,Cd1d1,Cd3d,Cd3e,Cd3g,Ccr7,H2-Oa,Hsph1,Lef1,Tnfrsf13c
4_Member	GO Biological Processes	GO:0022409	positive regulation of cell-cell adhesion	-6.67548	8/238	Adam8,Cd1d1,Cd3e,Ccr7,Hsph1,Lef1,Ets1,Tnfrsf13c
4_Member	GO Biological Processes	GO:1903037	regulation of leukocyte cell-cell adhesion	-6.11678	8/282	Adam8,Arg2,Cd1d1,Cd3e,Ccr7,Hsph1,Ets1,Tnfrsf13c
4_Member	GO Biological Processes	GO:0022407	regulation of cell-cell adhesion	-6.11341	9/387	Adam8,Arg2,Cd1d1,Cd3e,Ccr7,Hsph1,Lef1,Ets1,Tnfrsf13c
4_Member	GO Biological Processes	GO:1903039	positive regulation of leukocyte cell-cell adhesion	-6.00625	7/200	Adam8,Cd1d1,Cd3e,Ccr7,Hsph1,Ets1,Tnfrsf13c
4_Member	GO Biological Processes	GO:0045785	positive regulation of cell adhesion	-5.94083	9/406	Adam8,Cd1d1,Cd3e,Ccr7,Hsph1,Lef1,Thbs1,Ets1,Tnfrsf13c
4_Member	GO Biological Processes	GO:0050863	regulation of T cell activation	-5.88272	8/303	Adam8,Arg2,Cd1d1,Cd3e,Ccr7,H2-Oa,Hsph1,Tnfrsf13c
4_Member	GO Biological Processes	GO:0030155	regulation of cell adhesion	-5.85782	11/677	Adam8,Arg2,Cd1d1,Cd3e,Ccr7,S1pr1,Hsph1,Lef1,Thbs1,Ets1,Tnfrsf13c
4_Member	GO Biological Processes	GO:0007159	leukocyte cell-cell adhesion	-5.75682	8/315	Adam8,Arg2,Cd1d1,Cd3e,Ccr7,Hsph1,Ets1,Tnfrsf13c
4_Member	GO Biological Processes	GO:0046631	alpha-beta T cell activation	-5.41059	6/158	Arg2,Cd1d1,Cd3e,Ccr7,Hsph1,Lef1
4_Member	GO Biological Processes	GO:0001817	regulation of cytokine production	-5.07691	10/661	Adam8,Arg2,Cd1d1,Cd3e,Ccr7,Il1r2,Lef1,Thbs1,Tnfrsf13c,Ubash3a
4_Member	GO Biological Processes	GO:0046634	regulation of alpha-beta T cell activation	-5.03571	5/106	Arg2,Cd1d1,Cd3e,Ccr7,Hsph1
4_Member	GO Biological Processes	GO:0050870	positive regulation of T cell activation	-5.0172	6/185	Adam8,Cd1d1,Cd3e,Ccr7,Hsph1,Tnfrsf13c
4_Member	GO Biological Processes	GO:0098609	cell-cell adhesion	-4.75477	10/720	Adam8,Arg2,Cd1d1,Cd3e,Ccr7,Hsph1,Lef1,Ets1,Tnfrsf13c,Ubash3a
4_Member	GO Biological Processes	GO:0001816	cytokine production	-4.68286	10/734	Adam8,Arg2,Cd1d1,Cd3e,Ccr7,Il1r2,Lef1,Thbs1,Tnfrsf13c,Ubash3a
4_Member	GO Biological Processes	GO:0046635	positive regulation of alpha-beta T cell activation	-4.48964	4/68	Cd1d1,Cd3e,Ccr7,Hsph1
4_Member	GO Biological Processes	GO:0042108	positive regulation of cytokine biosynthetic process	-4.46456	4/69	Cd1d1,Cd3e,Thbs1,Tnfrsf13c
4_Member	GO Biological Processes	GO:0031295	T cell costimulation	-4.25189	3/28	Cd3e,Ccr7,Tnfrsf13c
4_Member	GO Biological Processes	GO:0031294	lymphocyte costimulation	-4.16035	3/30	Cd3e,Ccr7,Tnfrsf13c
4_Member	GO Biological Processes	GO:0032673	regulation of interleukin-4 production	-4.16035	3/30	Cd1d1,Cd3e,Lef1
4_Member	GO Biological Processes	GO:0042129	regulation of T cell proliferation	-4.06227	5/169	Arg2,Cd1d1,Cd3e,Ccr7,Tnfrsf13c
4_Member	GO Biological Processes	GO:0042102	positive regulation of T cell proliferation	-3.88561	4/97	Cd1d1,Cd3e,Ccr7,Tnfrsf13c
4_Member	GO Biological Processes	GO:0032633	interleukin-4 production	-3.88419	3/37	Cd1d1,Cd3e,Lef1
4_Member	GO Biological Processes	GO:0002460	adaptive immune response based on somatic recombination of immune receptors built from immunoglobuli	-3.79049	7/441	Cd19,Cd1d1,Ccr7,Cr2,Fcer2a,Lef1,Tnfrsf13c
4_Member	GO Biological Processes	GO:0002696	positive regulation of leukocyte activation	-3.75444	7/447	Adam8,Cd1d1,Cd3e,Ccr7,Hsph1,Thbs1,Tnfrsf13c
4_Member	GO Biological Processes	GO:0042035	regulation of cytokine biosynthetic process	-3.73683	4/106	Cd1d1,Cd3e,Thbs1,Tnfrsf13c
4_Member	GO Biological Processes	GO:0032649	regulation of interferon-gamma production	-3.67499	4/110	Cd1d1,Cd3e,Ccr7,Tnfrsf13c
4_Member	GO Biological Processes	GO:0042098	T cell proliferation	-3.66981	5/205	Arg2,Cd1d1,Cd3e,Ccr7,Tnfrsf13c
4_Member	GO Biological Processes	GO:0050867	positive regulation of cell activation	-3.66672	7/462	Adam8,Cd1d1,Cd3e,Ccr7,Hsph1,Thbs1,Tnfrsf13c
4_Member	GO Biological Processes	GO:0042089	cytokine biosynthetic process	-3.55823	4/118	Cd1d1,Cd3e,Thbs1,Tnfrsf13c
4_Member	GO Biological Processes	GO:0042107	cytokine metabolic process	-3.503	4/122	Cd1d1,Cd3e,Thbs1,Tnfrsf13c
4_Member	GO Biological Processes	GO:0032609	interferon-gamma production	-3.4895	4/123	Cd1d1,Cd3e,Ccr7,Tnfrsf13c
4_Member	GO Biological Processes	GO:0050671	positive regulation of lymphocyte proliferation	-3.324	4/136	Cd1d1,Cd3e,Ccr7,Tnfrsf13c
4_Member	GO Biological Processes	GO:0032946	positive regulation of mononuclear cell proliferation	-3.30006	4/138	Cd1d1,Cd3e,Ccr7,Tnfrsf13c
4_Member	GO Biological Processes	GO:0002824	positive regulation of adaptive immune response based on somatic recombination of immune receptors b	-3.26486	4/141	Cd1d1,Ccr7,Fcer2a,Tnfrsf13c
4_Member	GO Biological Processes	GO:0070665	positive regulation of leukocyte proliferation	-3.21916	4/145	Cd1d1,Cd3e,Ccr7,Tnfrsf13c
4_Member	GO Biological Processes	GO:0051251	positive regulation of lymphocyte activation	-3.20702	6/395	Adam8,Cd1d1,Cd3e,Ccr7,Hsph1,Tnfrsf13c
4_Member	GO Biological Processes	GO:0002821	positive regulation of adaptive immune response	-3.18577	4/148	Cd1d1,Ccr7,Fcer2a,Tnfrsf13c
4_Member	GO Biological Processes	GO:0001819	positive regulation of cytokine production	-2.98941	6/435	Adam8,Cd1d1,Cd3e,Ccr7,Thbs1,Tnfrsf13c
4_Member	GO Biological Processes	GO:0032729	positive regulation of interferon-gamma production	-2.94308	3/77	Cd1d1,Cd3e,Tnfrsf13c
4_Member	GO Biological Processes	GO:0002822	regulation of adaptive immune response based on somatic recombination of immune receptors built from	-2.75878	4/193	Cd1d1,Ccr7,Fcer2a,Tnfrsf13c
4_Member	GO Biological Processes	GO:0002819	regulation of adaptive immune response	-2.63299	4/209	Cd1d1,Ccr7,Fcer2a,Tnfrsf13c
5_Summary	KEGG Pathway	mmu04662	B cell receptor signaling pathway	-5.86586	5/72	Cd19,Cd22,Cd79a,Cr2,Rasgrp3,Adam8,Cd1d1,Cd3e,Ccr7,Fcer2a,Tnfrsf13c,Ubash3a
5_Member	KEGG Pathway	mmu04662	B cell receptor signaling pathway	-5.86586	5/72	Cd19,Cd22,Cd79a,Cr2,Rasgrp3
5_Member	GO Biological Processes	GO:0050778	positive regulation of immune response	-5.47293	11/742	Adam8,Cd19,Cd1d1,Cd22,Cd3e,Cd79a,Ccr7,Cr2,Fcer2a,Tnfrsf13c,Ubash3a
5_Member	GO Biological Processes	GO:0050854	regulation of antigen receptor-mediated signaling pathway	-4.82518	4/56	Cd19,Cd22,Ccr7,Ubash3a
5_Member	Reactome Gene Sets	R-MMU-983705	Signaling by the B Cell Receptor (BCR)	-4.76426	4/58	Cd19,Cd22,Cd79a,Rasgrp3
5_Member	Reactome Gene Sets	R-MMU-983695	Antigen activates B Cell Receptor (BCR) leading to generation of second messengers	-4.45775	3/24	Cd19,Cd22,Cd79a
5_Member	GO Biological Processes	GO:0050851	antigen receptor-mediated signaling pathway	-3.9093	6/292	Cd19,Cd22,Cd3e,Cd79a,Ccr7,Ubash3a
5_Member	GO Biological Processes	GO:0002429	immune response-activating cell surface receptor signaling pathway	-3.67157	6/323	Cd19,Cd22,Cd3e,Cd79a,Ccr7,Ubash3a
5_Member	GO Biological Processes	GO:0002768	immune response-regulating cell surface receptor signaling pathway	-3.58638	6/335	Cd19,Cd22,Cd3e,Cd79a,Ccr7,Ubash3a
5_Member	GO Biological Processes	GO:0002253	activation of immune response	-3.37141	7/517	Cd19,Cd22,Cd3e,Cd79a,Ccr7,Cr2,Ubash3a
5_Member	GO Biological Processes	GO:0002757	immune response-activating signal transduction	-2.94871	6/443	Cd19,Cd22,Cd3e,Cd79a,Ccr7,Ubash3a
5_Member	GO Biological Processes	GO:0002764	immune response-regulating signaling pathway	-2.88438	6/456	Cd19,Cd22,Cd3e,Cd79a,Ccr7,Ubash3a
5_Member	GO Biological Processes	GO:0050852	T cell receptor signaling pathway	-2.36384	3/123	Cd3e,Ccr7,Ubash3a
5_Member	GO Biological Processes	GO:0030183	B cell differentiation	-2.13321	3/149	Cd19,Cd79a,Cr2
6_Summary	GO Biological Processes	GO:2000106	regulation of leukocyte apoptotic process	-4.97657	5/109	Adam8,Arg2,Cd3g,Ccr7,Fcmr,Il1r2,Lef1,Cd1d1
6_Member	GO Biological Processes	GO:2000106	regulation of leukocyte apoptotic process	-4.97657	5/109	Adam8,Arg2,Cd3g,Ccr7,Fcmr
6_Member	GO Biological Processes	GO:0071887	leukocyte apoptotic process	-4.57384	5/132	Adam8,Arg2,Cd3g,Ccr7,Fcmr
6_Member	GO Biological Processes	GO:0070228	regulation of lymphocyte apoptotic process	-4.27679	4/77	Adam8,Arg2,Cd3g,Fcmr
6_Member	GO Biological Processes	GO:0070227	lymphocyte apoptotic process	-3.86837	4/98	Adam8,Arg2,Cd3g,Fcmr
6_Member	GO Biological Processes	GO:0050704	regulation of interleukin-1 secretion	-3.68817	3/43	Arg2,Ccr7,Il1r2
6_Member	GO Biological Processes	GO:0050701	interleukin-1 secretion	-3.49299	3/50	Arg2,Ccr7,Il1r2
6_Member	GO Biological Processes	GO:2000107	negative regulation of leukocyte apoptotic process	-3.08149	3/69	Arg2,Ccr7,Fcmr
6_Member	GO Biological Processes	GO:0032652	regulation of interleukin-1 production	-2.89508	3/80	Arg2,Ccr7,Il1r2
6_Member	GO Biological Processes	GO:0032612	interleukin-1 production	-2.7206	3/92	Arg2,Ccr7,Il1r2
6_Member	GO Biological Processes	GO:0035710	CD4-positive, alpha-beta T cell activation	-2.61733	3/100	Arg2,Ccr7,Lef1
6_Member	KEGG Pathway	mmu05146	Amoebiasis	-2.54554	3/106	Arg2,Cd1d1,Il1r2
7_Summary	GO Biological Processes	GO:0010955	negative regulation of protein processing	-3.95706	3/35	Il1r2,Thbs1,Fcmr,Lef1,Cpm,Arg2,Adam8
7_Member	GO Biological Processes	GO:0010955	negative regulation of protein processing	-3.95706	3/35	Il1r2,Thbs1,Fcmr
7_Member	GO Biological Processes	GO:1903318	negative regulation of protein maturation	-3.95706	3/35	Il1r2,Thbs1,Fcmr
7_Member	GO Biological Processes	GO:0070613	regulation of protein processing	-2.95953	3/76	Il1r2,Thbs1,Fcmr
7_Member	GO Biological Processes	GO:1903317	regulation of protein maturation	-2.92686	3/78	Il1r2,Thbs1,Fcmr
7_Member	GO Biological Processes	GO:0043154	negative regulation of cysteine-type endopeptidase activity involved in apoptotic process	-2.89508	3/80	Lef1,Thbs1,Fcmr
7_Member	GO Biological Processes	GO:2000117	negative regulation of cysteine-type endopeptidase activity	-2.80459	3/86	Lef1,Thbs1,Fcmr
7_Member	GO Biological Processes	GO:0016485	protein processing	-2.45662	4/234	Il1r2,Thbs1,Fcmr,Cpm
7_Member	GO Biological Processes	GO:0001818	negative regulation of cytokine production	-2.35459	4/250	Arg2,Il1r2,Lef1,Thbs1
7_Member	GO Biological Processes	GO:0007162	negative regulation of cell adhesion	-2.19285	4/278	Adam8,Arg2,Lef1,Thbs1
7_Member	GO Biological Processes	GO:0051604	protein maturation	-2.08847	4/298	Il1r2,Thbs1,Fcmr,Cpm
8_Summary	GO Biological Processes	GO:0060326	cell chemotaxis	-3.85322	6/299	Adam8,Ccr7,S1pr1,Gab1,Lef1,Thbs1,Cd1d1,Ets1,Cd19,Hsph1,Etaa1,Dnaja1,H2-Oa,Arg2,Spib,Anln
8_Member	GO Biological Processes	GO:0060326	cell chemotaxis	-3.85322	6/299	Adam8,Ccr7,S1pr1,Gab1,Lef1,Thbs1
8_Member	GO Biological Processes	GO:1903708	positive regulation of hemopoiesis	-3.66001	5/206	Adam8,Cd1d1,Ccr7,Lef1,Ets1
8_Member	GO Biological Processes	GO:0033674	positive regulation of kinase activity	-3.58226	7/477	Adam8,Cd19,Ccr7,Gab1,Hsph1,Thbs1,Etaa1
8_Member	GO Biological Processes	GO:0072678	T cell migration	-3.32469	3/57	Adam8,Ccr7,S1pr1
8_Member	GO Biological Processes	GO:0030335	positive regulation of cell migration	-3.29726	7/532	Adam8,Ccr7,S1pr1,Gab1,Lef1,Thbs1,Ets1
8_Member	GO Biological Processes	GO:0051347	positive regulation of transferase activity	-3.21616	7/549	Adam8,Cd19,Ccr7,Gab1,Hsph1,Thbs1,Etaa1
8_Member	GO Biological Processes	GO:2000147	positive regulation of cell motility	-3.19288	7/554	Adam8,Ccr7,S1pr1,Gab1,Lef1,Thbs1,Ets1
8_Member	GO Biological Processes	GO:0043549	regulation of kinase activity	-3.1897	8/728	Adam8,Cd19,Ccr7,Gab1,Dnaja1,Hsph1,Thbs1,Etaa1
8_Member	GO Biological Processes	GO:0045580	regulation of T cell differentiation	-3.16392	4/150	Adam8,Cd1d1,Ccr7,H2-Oa
8_Member	GO Biological Processes	GO:1903706	regulation of hemopoiesis	-3.1615	6/403	Adam8,Cd1d1,Ccr7,H2-Oa,Lef1,Ets1
8_Member	GO Biological Processes	GO:0051272	positive regulation of cellular component movement	-3.11557	7/571	Adam8,Ccr7,S1pr1,Gab1,Lef1,Thbs1,Ets1
8_Member	GO Biological Processes	GO:1903555	regulation of tumor necrosis factor superfamily cytokine production	-3.08987	4/157	Adam8,Arg2,Ccr7,Thbs1
8_Member	GO Biological Processes	GO:0071706	tumor necrosis factor superfamily cytokine production	-3.06938	4/159	Adam8,Arg2,Ccr7,Thbs1
8_Member	GO Biological Processes	GO:0071902	positive regulation of protein serine/threonine kinase activity	-3.05249	5/280	Adam8,Ccr7,Gab1,Thbs1,Etaa1
8_Member	GO Biological Processes	GO:0040017	positive regulation of locomotion	-3.04963	7/586	Adam8,Ccr7,S1pr1,Gab1,Lef1,Thbs1,Ets1
8_Member	GO Biological Processes	GO:0071900	regulation of protein serine/threonine kinase activity	-3.03101	6/427	Adam8,Ccr7,Gab1,Dnaja1,Thbs1,Etaa1
8_Member	GO Biological Processes	GO:1902107	positive regulation of leukocyte differentiation	-2.9998	4/166	Adam8,Cd1d1,Ccr7,Lef1
8_Member	GO Biological Processes	GO:0045860	positive regulation of protein kinase activity	-2.96895	6/439	Adam8,Ccr7,Gab1,Hsph1,Thbs1,Etaa1
8_Member	GO Biological Processes	GO:1902105	regulation of leukocyte differentiation	-2.96458	5/293	Adam8,Cd1d1,Ccr7,H2-Oa,Lef1
8_Member	GO Biological Processes	GO:0043405	regulation of MAP kinase activity	-2.94492	5/296	Adam8,Ccr7,Gab1,Dnaja1,Thbs1
8_Member	GO Biological Processes	GO:0032103	positive regulation of response to external stimulus	-2.88728	5/305	Adam8,Ccr7,S1pr1,Thbs1,Ets1
8_Member	GO Biological Processes	GO:0045619	regulation of lymphocyte differentiation	-2.85218	4/182	Adam8,Cd1d1,Ccr7,H2-Oa
8_Member	GO Biological Processes	GO:0045859	regulation of protein kinase activity	-2.74076	7/663	Adam8,Ccr7,Gab1,Dnaja1,Hsph1,Thbs1,Etaa1
8_Member	GO Biological Processes	GO:1903557	positive regulation of tumor necrosis factor superfamily cytokine production	-2.70718	3/93	Adam8,Ccr7,Thbs1
8_Member	GO Biological Processes	GO:0045582	positive regulation of T cell differentiation	-2.69391	3/94	Adam8,Cd1d1,Ccr7
8_Member	GO Biological Processes	GO:0072676	lymphocyte migration	-2.65498	3/97	Adam8,Ccr7,S1pr1
8_Member	GO Biological Processes	GO:0001525	angiogenesis	-2.63456	6/511	Adam8,S1pr1,Gab1,Lef1,Thbs1,Ets1
8_Member	GO Biological Processes	GO:0030595	leukocyte chemotaxis	-2.61803	4/211	Adam8,Ccr7,S1pr1,Thbs1
8_Member	GO Biological Processes	GO:0002573	myeloid leukocyte differentiation	-2.59588	4/214	Adam8,Ccr7,Lef1,Spib
8_Member	GO Biological Processes	GO:0043406	positive regulation of MAP kinase activity	-2.53848	4/222	Adam8,Ccr7,Gab1,Thbs1
8_Member	GO Biological Processes	GO:0045621	positive regulation of lymphocyte differentiation	-2.53401	3/107	Adam8,Cd1d1,Ccr7
8_Member	GO Biological Processes	GO:0043534	blood vessel endothelial cell migration	-2.45638	3/114	Adam8,Thbs1,Ets1
8_Member	GO Biological Processes	GO:0046632	alpha-beta T cell differentiation	-2.45638	3/114	Cd1d1,Ccr7,Lef1
8_Member	GO Biological Processes	GO:0000187	activation of MAPK activity	-2.42467	3/117	Ccr7,Gab1,Thbs1
8_Member	GO Biological Processes	GO:0030099	myeloid cell differentiation	-2.38694	5/398	Adam8,Ccr7,Lef1,Ets1,Spib
8_Member	GO Biological Processes	GO:0006935	chemotaxis	-2.34929	6/584	Adam8,Ccr7,S1pr1,Gab1,Lef1,Thbs1
8_Member	GO Biological Processes	GO:0042330	taxis	-2.33852	6/587	Adam8,Ccr7,S1pr1,Gab1,Lef1,Thbs1
8_Member	GO Biological Processes	GO:0050729	positive regulation of inflammatory response	-2.23366	3/137	Adam8,Ccr7,Ets1
8_Member	GO Biological Processes	GO:0050921	positive regulation of chemotaxis	-2.23366	3/137	Ccr7,S1pr1,Thbs1
8_Member	GO Biological Processes	GO:0048514	blood vessel morphogenesis	-2.22779	6/619	Adam8,S1pr1,Gab1,Lef1,Thbs1,Ets1
8_Member	GO Biological Processes	GO:0002687	positive regulation of leukocyte migration	-2.19913	3/141	Adam8,Ccr7,Thbs1
8_Member	GO Biological Processes	GO:0010631	epithelial cell migration	-2.18743	4/279	Adam8,Thbs1,Ets1,Anln
8_Member	GO Biological Processes	GO:0090132	epithelium migration	-2.17665	4/281	Adam8,Thbs1,Ets1,Anln
8_Member	GO Biological Processes	GO:0090130	tissue migration	-2.16596	4/283	Adam8,Thbs1,Ets1,Anln
8_Member	GO Biological Processes	GO:0097530	granulocyte migration	-2.16567	3/145	Adam8,Ccr7,Thbs1
8_Member	GO Biological Processes	GO:0032680	regulation of tumor necrosis factor production	-2.08629	3/155	Arg2,Ccr7,Thbs1
8_Member	GO Biological Processes	GO:0032640	tumor necrosis factor production	-2.07867	3/156	Arg2,Ccr7,Thbs1
9_Summary	GO Biological Processes	GO:0032101	regulation of response to external stimulus	-3.0828	8/756	Adam8,Arg2,Ccr7,S1pr1,Il1r2,Thbs1,Ets1,Siglecg,Chil3
9_Member	GO Biological Processes	GO:0032101	regulation of response to external stimulus	-3.0828	8/756	Adam8,Arg2,Ccr7,S1pr1,Il1r2,Thbs1,Ets1,Siglecg
9_Member	GO Biological Processes	GO:0032102	negative regulation of response to external stimulus	-2.7369	5/330	Arg2,Il1r2,Thbs1,Ets1,Siglecg
9_Member	GO Biological Processes	GO:0006954	inflammatory response	-2.70026	7/674	Adam8,Chil3,Ccr7,Il1r2,Thbs1,Ets1,Siglecg
9_Member	GO Biological Processes	GO:0050727	regulation of inflammatory response	-2.66381	5/343	Adam8,Ccr7,Il1r2,Ets1,Siglecg
9_Member	GO Biological Processes	GO:0031348	negative regulation of defense response	-2.62549	4/210	Arg2,Il1r2,Ets1,Siglecg
9_Member	GO Biological Processes	GO:0031347	regulation of defense response	-2.23786	6/616	Adam8,Arg2,Ccr7,Il1r2,Ets1,Siglecg
9_Member	GO Biological Processes	GO:0050728	negative regulation of inflammatory response	-2.17394	3/144	Il1r2,Ets1,Siglecg
10_Summary	Reactome Gene Sets	R-MMU-163125	Post-translational modification: synthesis of GPI-anchored proteins	-2.74793	3/90	Ly6d,Izumo1r,Cpm
10_Member	Reactome Gene Sets	R-MMU-163125	Post-translational modification: synthesis of GPI-anchored proteins	-2.74793	3/90	Ly6d,Izumo1r,Cpm
11_Summary	GO Biological Processes	GO:0043506	regulation of JUN kinase activity	-2.68078	3/95	Ccr7,Gab1,Dnaja1,Hsph1,Arg2,Etaa1,Fkbp5
11_Member	GO Biological Processes	GO:0043506	regulation of JUN kinase activity	-2.68078	3/95	Ccr7,Gab1,Dnaja1
11_Member	GO Biological Processes	GO:0032872	regulation of stress-activated MAPK cascade	-2.45001	4/235	Ccr7,Gab1,Dnaja1,Hsph1
11_Member	GO Biological Processes	GO:0070302	regulation of stress-activated protein kinase signaling cascade	-2.43689	4/237	Ccr7,Gab1,Dnaja1,Hsph1
11_Member	GO Biological Processes	GO:0051403	stress-activated MAPK cascade	-2.28867	4/261	Ccr7,Gab1,Dnaja1,Hsph1
11_Member	GO Biological Processes	GO:0080135	regulation of cellular response to stress	-2.11156	6/655	Arg2,Ccr7,Gab1,Dnaja1,Hsph1,Etaa1
11_Member	GO Biological Processes	GO:0006457	protein folding	-2.1095	3/152	Fkbp5,Dnaja1,Hsph1
11_Member	GO Biological Processes	GO:0031098	stress-activated protein kinase signaling cascade	-2.10868	4/294	Ccr7,Gab1,Dnaja1,Hsph1
12_Summary	KEGG Pathway	mmu04014	Ras signaling pathway	-2.49694	4/228	Gab1,Gnb1,Ets1,Rasgrp3
12_Member	KEGG Pathway	mmu04014	Ras signaling pathway	-2.49694	4/228	Gab1,Gnb1,Ets1,Rasgrp3

## Sheet: Upregulated
GroupID	Category	Term	Description	LogP	InTerm_InList	Symbols
1_Summary	KEGG Pathway	mmu00190	Oxidative phosphorylation	-5.61876	5/134	COX1,ND1,ND2,ND4,ND6,Irs2,Aif1,Atp2b4
1_Member	KEGG Pathway	mmu00190	Oxidative phosphorylation	-5.61876	5/134	COX1,ND1,ND2,ND4,ND6
1_Member	Reactome Gene Sets	R-MMU-6799198	Complex I biogenesis	-5.60293	4/59	ND1,ND2,ND4,ND6
1_Member	KEGG Pathway	mmu05012	Parkinson's disease	-5.46518	5/144	COX1,ND1,ND2,ND4,ND6
1_Member	Reactome Gene Sets	R-MMU-611105	Respiratory electron transport	-5.46052	4/64	ND1,ND2,ND4,ND6
1_Member	Reactome Gene Sets	R-MMU-163200	Respiratory electron transport, ATP synthesis by chemiosmotic coupling, and heat production by uncou	-4.96762	4/85	ND1,ND2,ND4,ND6
1_Member	CORUM	CORUM:381	Respiratory chain complex I, mitochondrial	-4.53036	3/37	ND1,ND2,ND4
1_Member	GO Biological Processes	GO:0015980	energy derivation by oxidation of organic compounds	-4.31573	5/249	COX1,ND1,ND2,ND4,Irs2
1_Member	Reactome Gene Sets	R-MMU-1428517	The citric acid (TCA) cycle and respiratory electron transport	-4.16475	4/136	ND1,ND2,ND4,ND6
1_Member	GO Biological Processes	GO:0042775	mitochondrial ATP synthesis coupled electron transport	-3.98715	3/56	COX1,ND2,ND4
1_Member	GO Biological Processes	GO:0045333	cellular respiration	-3.90194	4/159	COX1,ND1,ND2,ND4
1_Member	GO Biological Processes	GO:0042773	ATP synthesis coupled electron transport	-3.89759	3/60	COX1,ND2,ND4
1_Member	GO Biological Processes	GO:0009060	aerobic respiration	-3.66211	3/72	COX1,ND1,ND4
1_Member	GO Biological Processes	GO:0006091	generation of precursor metabolites and energy	-3.55994	5/361	COX1,ND1,ND2,ND4,Irs2
1_Member	GO Biological Processes	GO:0022904	respiratory electron transport chain	-3.52684	3/80	COX1,ND2,ND4
1_Member	GO Biological Processes	GO:0022900	electron transport chain	-3.44929	3/85	COX1,ND2,ND4
1_Member	GO Biological Processes	GO:0006119	oxidative phosphorylation	-3.34836	3/92	COX1,ND2,ND4
1_Member	GO Biological Processes	GO:0017144	drug metabolic process	-2.25287	5/713	Aif1,COX1,ND2,ND4,Atp2b4
1_Member	GO Biological Processes	GO:0046034	ATP metabolic process	-2.19665	3/233	COX1,ND2,ND4
1_Member	GO Biological Processes	GO:0009167	purine ribonucleoside monophosphate metabolic process	-2.07527	3/258	COX1,ND2,ND4
1_Member	GO Biological Processes	GO:0009205	purine ribonucleoside triphosphate metabolic process	-2.07527	3/258	COX1,ND2,ND4
1_Member	GO Biological Processes	GO:0009126	purine nucleoside monophosphate metabolic process	-2.07069	3/259	COX1,ND2,ND4
1_Member	GO Biological Processes	GO:0009161	ribonucleoside monophosphate metabolic process	-2.05706	3/262	COX1,ND2,ND4
1_Member	GO Biological Processes	GO:0009199	ribonucleoside triphosphate metabolic process	-2.05706	3/262	COX1,ND2,ND4
1_Member	GO Biological Processes	GO:0009144	purine nucleoside triphosphate metabolic process	-2.03473	3/267	COX1,ND2,ND4
1_Member	GO Biological Processes	GO:0009123	nucleoside monophosphate metabolic process	-2.00853	3/273	COX1,ND2,ND4
2_Summary	GO Biological Processes	GO:1902806	regulation of cell cycle G1/S phase transition	-2.93136	3/128	Aif1,Cirbp,Atp2b4,Pbx1
2_Member	GO Biological Processes	GO:1902806	regulation of cell cycle G1/S phase transition	-2.93136	3/128	Aif1,Cirbp,Atp2b4
2_Member	GO Biological Processes	GO:1901987	regulation of cell cycle phase transition	-2.91003	4/291	Aif1,Cirbp,Pbx1,Atp2b4
2_Member	GO Biological Processes	GO:0044843	cell cycle G1/S phase transition	-2.47567	3/185	Aif1,Cirbp,Atp2b4
2_Member	GO Biological Processes	GO:0044770	cell cycle phase transition	-2.46016	4/387	Aif1,Cirbp,Pbx1,Atp2b4
3_Summary	GO Biological Processes	GO:0050671	positive regulation of lymphocyte proliferation	-2.85561	3/136	Aif1,Spn,Irs2,Lpl,Pde8b
3_Member	GO Biological Processes	GO:0050671	positive regulation of lymphocyte proliferation	-2.85561	3/136	Aif1,Spn,Irs2
3_Member	GO Biological Processes	GO:0032946	positive regulation of mononuclear cell proliferation	-2.83741	3/138	Aif1,Spn,Irs2
3_Member	GO Biological Processes	GO:0070665	positive regulation of leukocyte proliferation	-2.77585	3/145	Aif1,Spn,Irs2
3_Member	GO Biological Processes	GO:0050670	regulation of lymphocyte proliferation	-2.23854	3/225	Aif1,Spn,Irs2
3_Member	GO Biological Processes	GO:0032944	regulation of mononuclear cell proliferation	-2.22792	3/227	Aif1,Spn,Irs2
3_Member	GO Biological Processes	GO:0070663	regulation of leukocyte proliferation	-2.17126	3/238	Aif1,Spn,Irs2
3_Member	GO Biological Processes	GO:0050708	regulation of protein secretion	-2.15295	4/473	Aif1,Lpl,Pde8b,Irs2
3_Member	GO Biological Processes	GO:0002791	regulation of peptide secretion	-2.0342	4/512	Aif1,Lpl,Pde8b,Irs2
4_Summary	GO Biological Processes	GO:0072006	nephron development	-2.75884	3/147	Ctnnd1,Pbx1,Mtss1
4_Member	GO Biological Processes	GO:0072006	nephron development	-2.75884	3/147	Ctnnd1,Pbx1,Mtss1
5_Summary	GO Biological Processes	GO:0006694	steroid biosynthetic process	-2.68522	3/156	Pbx1,Dhcr24,Pde8b
5_Member	GO Biological Processes	GO:0006694	steroid biosynthetic process	-2.68522	3/156	Pbx1,Dhcr24,Pde8b
6_Summary	KEGG Pathway	mmu03010	Ribosome	-2.52975	3/177	Rps21,Rpl39,Rps15a
6_Member	KEGG Pathway	mmu03010	Ribosome	-2.52975	3/177	Rps21,Rpl39,Rps15a
7_Summary	GO Biological Processes	GO:0043086	negative regulation of catalytic activity	-2.35851	5/673	Rasa4,Dhcr24,Serpinb10,Atp2b4,Irs2
7_Member	GO Biological Processes	GO:0043086	negative regulation of catalytic activity	-2.35851	5/673	Rasa4,Dhcr24,Serpinb10,Atp2b4,Irs2
8_Summary	GO Biological Processes	GO:0009615	response to virus	-2.03916	3/266	Spn,Rps15a,Batf3
8_Member	GO Biological Processes	GO:0009615	response to virus	-2.03916	3/266	Spn,Rps15a,Batf3
9_Summary	GO Biological Processes	GO:0051258	protein polymerization	-2.00423	3/274	Aif1,Tppp3,Mtss1
9_Member	GO Biological Processes	GO:0051258	protein polymerization	-2.00423	3/274	Aif1,Tppp3,Mtss1
